# Supplementary material
Source: PubMed Central journal article supplement (PMC4284589)
Supplement: pnas.201421056SI.pdf [file pnas.201421056SI.pdf]

# Supporting Information

Alme et al. 10.1073/pnas.1421056111

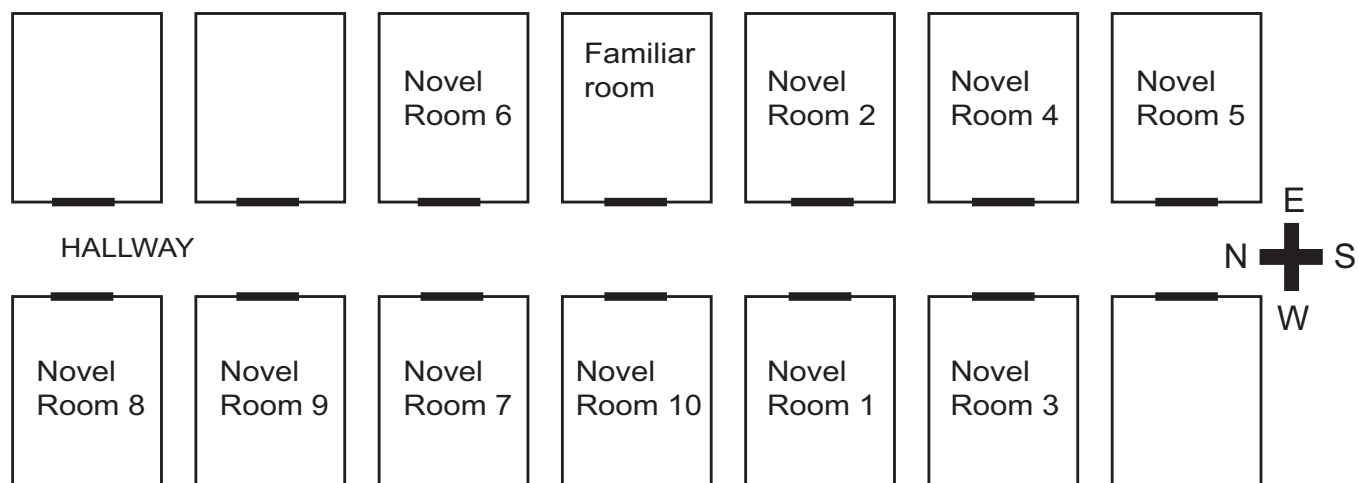

Fig. S1. Schematic of the location of rooms in relation to each other. Thick black lines indicate the position of the door in each room.
